# Supplementary material
Source: publisher site journal article supplement (https://www.dovepress.com/article/569152)
Supplement: Supplementary file 1 [file Supplementary%20Material.docx]

Table S1. Baseline clinical and cycle characteristics in GnRH-a + HRT vs HRT

| Variable | GnRH-a + HRT  (N=599) | HRT  (N=1189) | *p* |
| --- | --- | --- | --- |
| Age, y | 35.00 (32.00–39.00) | 35.00 (31.00–40.00) | .906 |
| BMI, kg/m2 | 21.63 (20.02–23.88) | 21.50 (19.83–23.82) | .237 |
| AFC | 4.00 (3.00–6.00) | 4.00 (3.00–6.00) | .777 |
| AMH level, ng/ml | 0.91 (0.63–1.18) | 0.91 (0.60–1.17) | .692 |
| Duration of infertility, y | 3.00 (1.00–5.00) | 3.00 (1.00–5.00) | .783 |
| Duration of stimulation, d | 9.00 (8.00–11.00) | 9.00 (8.00–11.00) | .726 |
| FSH, mIU/mL | 9.38 (7.42–11.54) | 9.16 (7.31–11.79) | .840 |
| E2, pg/mL | 1325.00 (886.50–1929.50) | 1256.00 (813.00–1794.00) | .018* |
| P | 0.61 (0.41–0.94) | 0.65 (0.44–0.98) | .067 |
| Endometrial thickness, mm | 9.30 (8.50–10.60) | 9.00 (8.40–9.90) | <.0001* |
| Gonadotropin dose, IU | 3000.00 (2400.00–3600.00) | 2902.50 (2400.00–3450.00) | .008* |
| No. of oocytes retrieved | 6.00 (4.00–9.00) | 5.00 (3.00–7.00) | <.0001* |
| No. of MII oocytes | 5.00 (3.00–7.00) | 4.00 (3.00–7.00) | .0003* |
| No. of 2PN | 4.00 (2.00–5.00) | 3.00 (2.00–5.00) | .0002* |
|  |  |  |  |
| Normal fertilization rate, n (%) | 72.73 (55.56–92.12) | 75.00 (50.00–100.00) | .4930 |
| Blastocyst formation rate n (%) | 71.43 (50.00–100.00) | 66.67 (50.00–100.00) | .2910 |
|  |  |  |  |
| Infertility diagnosis, n (%) |  |  | .328 |
| Primary infertility | 379 (63.3%) | 724 (60.9%) |  |
| Secondary infertility | 220 (36.7%) | 465 (39.1%) |  |
|  |  |  |  |
| Infertility etiology, n (%) |  |  | .002* |
| Male factors | 108 (18.0%) | 295 (24.8%) |  |
| Female factors | 448 (74.8%) | 834 (70.1%) |  |
| Unexplained/Other | 43 (7.2%) | 60 (5.0%) |  |
|  |  |  |  |
| Ovarian stimulation protocols, n (%) |  |  | .031* |
| PPOS | 240 (40.1%) | 486 (40.9%) |  |
| GnRH antagonist | 295 (49.2%) | 528 (44.4%) |  |
| Other protocols | 64 (10.7%) | 175 (14.7%) |  |
|  |  |  |  |
| Luteal phase support, n (%) |  |  | <.0001* |
| Intramuscular injection and oral administration | 11 (1.8%) | 91 (7.7%) |  |
| Vaginal gel administration and oral administration | 288 (48.1%) | 547 (46.0%) |  |
| Vaginal suppository administration and oral administration | 295 (49.2%) | 543 (45.7%) |  |
| Others | 5 (0.8%) | 8 (0.7%) |  |
|  |  |  |  |
| Fertilization, n (%) |  |  | .495 |
| IVF | 403 (67.3%) | 801 (67.4%) |  |
| ICSI | 183 (30.6%) | 351 (29.5%) |  |
| Rescue ICSI | 13 (2.2%) | 37 (3.1%) |  |
|  |  |  |  |
| No. of embryos thawed |  |  | 0.007* |
| 1 | 389 (64.9) | 809 (68.4) |  |
| 2 | 209 (34.9) | 357 (30.2) |  |
| >=3 | 1 (0.2) | 17 (1.4) |  |
|  |  |  |  |
| No. of surviving embryos |  |  | .030* |
| 1 | 393 (65.8) | 812 (68.5) |  |
| 2 | 203 (34.0) | 359 (30.3) |  |
| 3 | 1 (0.2) | 14 (1.2) |  |
|  |  |  |  |
| No. of embryos transferred |  |  | .135 |
| 1 | 395 (66.4) | 828 (69.9) |  |
| 2 | 200 (33.6) | 357 (30.1) |  |

Notes: Continuous variables are presented as median (first–third quartile) and compared using the Wilcoxon rank-sum test; categorical variables are n (%) and compared using the χ² test or Fisher’s exact test, as appropriate. p values refer to between-group comparisons in the matched cohort. **p*< .05.

Table S2. Baseline clinical and cycle characteristics in NC vs HRT

| Variable | NC  (N=458) | HRT  (N=912) | *p* |
| --- | --- | --- | --- |
| Age, y | 36.00 (32.00–40.00) | 36.00 (32.00–40.00) | .844 |
| BMI, kg/m2 | 21.76 (19.91–23.73) | 21.77 (20.00–23.74) | .857 |
| AFC | 4.00 (3.00–6.00) | 4.00 (3.00–6.00) | .591 |
| AMH level, ng/ml | 0.84 (0.56–1.10) | 0.86 (0.56–1.10) | .745 |
| Duration of infertility, y | 2.00 (1.00–5.00) | 2.00 (1.00–5.00) | .584 |
| Duration of stimulation, d | 9.00 (8.00–10.00) | 9.00 (8.00–10.00) | .560 |
| FSH, mIU/mL | 9.36 (7.28–12.34) | 9.38 (7.49–12.09) | .463 |
| E2, pg/mL | 1137.00 (748.25–1662.75) | 1171.00 (776.00–1634.00) | .519 |
| P | 0.63 (0.40–0.93) | 0.59 (0.41–0.93) | .988 |
| Endometrial thickness, mm | 9.00 (8.30–9.80) | 9.40 (8.30–10.70) | <.0001* |
| Gonadotropin dose, IU | 2775.00 (2325.00–3335.62) | 2812.50 (2400.00–3450.00) | .308 |
| No. of oocytes retrieved | 5.00 (3.00–7.00) | 5.00 (3.00–7.00) | .159 |
| No. of MII oocytes | 4.00 (2.00–6.00) | 4.00 (3.00–6.00) | .178 |
| No. of 2PN | 3.00 (2.00–4.00) | 3.00 (2.00–5.00) | .109 |
|  |  |  |  |
| Normal fertilization rate, n (%) | 75.00 (55.56–100.00) | 75.00 (50.00–100.00) | .5800 |
| Blastocyst formation rate, n (%) | 75.00 (50.00–100.00) | 66.67 (42.86–100.00) | .0996 |
|  |  |  |  |
| Infertility diagnosis, n (%) |  |  | .958 |
| Primary infertility | 270 (59.0%) | 539 (59.1%) |  |
| Secondary infertility | 188 (41.0%) | 373 (40.9%) |  |
|  |  |  |  |
| Infertility etiology, n (%) |  |  | .474 |
| Male factor | 115 (25.1%) | 207 (22.7%) |  |
| Female factors | 316 (69.0%) | 658 (72.1%) |  |
| Unexplained/Other | 27 (5.9%) | 47 (5.2%) |  |
|  |  |  |  |
| Ovarian stimulation protocols, n (%) |  |  | .101 |
| PPOS | 175 (38.2%) | 397 (43.5%) |  |
| GnRH antagonist | 219 (47.8%) | 382 (41.9%) |  |
| Other protocols | 64 (14.0%) | 133 (14.6%) |  |
|  |  |  |  |
| Luteal phase support, n (%) |  |  | <.0001* |
| Intramuscular injection and oral administration | 40 (8.7%) | 84 (9.2%) |  |
| Vaginal gel administration and oral administration | 154 (33.6%) | 413 (45.3%) |  |
| Vaginal suppository administration and oral administration | 177 (38.6%) | 408 (44.7%) |  |
| Others | 87 (19.0%) | 7 (0.8%) |  |
|  |  |  |  |
| Fertilization, n (%) | 314 (68.6%) | 623 (68.3%) | .137 |
| IVF | 135 (29.5%) | 253 (27.7%) |  |
| ICSI | 9 (2.0%) | 36 (3.9%) |  |
| Rescue ICSI |  |  |  |
|  |  |  |  |
| No. of embryos thawed |  |  | .598 |
| 1 | 327 (71.6) | 625 (69.1) |  |
| 2 | 125 (27.4) | 267 (29.5) |  |
| >=3 | 5 (1.1) | 13 (1.4) |  |
|  |  |  |  |
| No. of surviving embryos |  |  | .644 |
| 1 | 328 (71.8) | 630 (69.5) |  |
| 2 | 124 (27.1) | 267 (29.5) |  |
| 3 | 5 (1.1) | 9 (1.0) |  |
|  |  |  |  |
| No. of embryos transferred |  |  | .397 |
| 1 | 333 (72.9) | 641 (70.7) |  |
| 2 | 124 (27.1) | 266 (29.3) |  |

Notes: Continuous variables are presented as median (first–third quartile) and compared using the Wilcoxon rank-sum test; categorical variables are n (%) and compared using the χ² test or Fisher’s exact test, as appropriate. p values refer to between-group comparisons in the matched cohort. **p* < .05.

Table S3. Adjusted predicted rates (%) by age strata and regimen (IPTW-weighted logistic, marginal standardization).

|  | <35 | | ≥35 | |
| --- | --- | --- | --- | --- |
|  | HRT | GnRH-a +HRT | HRT | GnRH-a +HRT |
| Live Birth | 34.86 | 39.20 | 17.09 | 22.98 |
| Clinical Pregnancy | 44.01 | 45.44 | 26.96 | 35.58 |
| Miscarriage | 7.855 | 5.06 | 9.057 | 12.68 |
| Multiple Pregnancy | 5.464 | 6.70 | 2.421 | 5.04 |
| Ectopic Pregnancy | 0.656 | 0.83 | 0.688 | 0.00 |
| Biochemical Pregnancy | 8.059 | 5.93 | 5.733 | 7.51 |

Values are adjusted predicted rates (%) from IPTW-weighted multivariable logistic models with marginal standardization. Covariates: BMI, AMH, AFC, duration of infertility, infertility type, endometrial thickness at transfer, and number of embryos transferred. Age strata: <35 vs ≥35 years; exposure: GnRH-a + HRT vs HRT. Rates are percentages; no multiplicity adjustment in this descriptive table.

Table S4. Absolute risk difference (ARD, percentage points) and NNT/NNH for GnRH-a + HRT vs HRT by age strata.

| GnRH-a +HRT vs HRT |  |  |  |  |
| --- | --- | --- | --- | --- |
|  | <35 | | ≥35 | |
|  | ARD (pp) | NNT/NNH | ARD (pp) | NNT/NNH |
| Live Birth | +4.34 | 23 | +5.89 | 17 |
| Clinical Pregnancy | +1.43 | 70 | +8.62 | 12 |
| Miscarriage | -2.80 | 36 NNH | +3.62 | 28 |
| Multiple Pregnancy | +1.23 | 81 | +2.62 | 38 |
| Ectopic Pregnancy | +0.18 | 560 | -0.69 | 145 NNH |
| Biochemical Pregnancy | -2.13 | 47 NNH | +1.78 | 56 |

ARD = Predicted rate (GnRH-a + HRT) − Predicted rate (HRT), in percentage points (pp). Positive ARD favors GnRH-a + HRT for beneficial outcomes; negative ARD implies potential harm and is labeled NNH. NNT/NNH = 1/|ARD| using ARD in proportions; values are rounded to integers.

Table S5. Age-stratified sensitivity analyses of reproductive outcomes comparing GnRH-a + HRT vs HRT.

|  | aOR(95%CI) | *p* | aOR(95%CI) | *p* |
| --- | --- | --- | --- | --- |
|  | <35 | | ≥35 | |
| Live Birth | 1.41(1.41-1.42) | <0.001* | 1.43(1.43-1.44) | <.001* |
| Clinical Pregnancy | 1.21(0.91-1.60) | 0.189 | 1.60(1.23-2.11) | .001 |
| Miscarriage | 0.37(0.11-1.32) | 0.127 | 1.41(0.62-3.24) | .416 |
| Multiple Pregnancy | 2.62(2.61-2.63) | <0.001* | 3.01(3.00-3.02) | <.001* |
| Ectopic Pregnancy | 0.39(0.01-16.40) | 0.623 |  | .998 |
| Biochemical Pregnancy | 0.71(0.31-1.63) | 0.422 | 0.87(0.40-1.90) | .731 |

aORs are adjusted for BMI, AMH, AFC, infertility duration, infertility type, endometrial thickness, and number of embryos transferred. GLMM includes a patient-level random intercept. Two-sided P-values are reported. **p*< .05
